1 **Asymmetric evolvability leads to specialization without trade-offs**

2 Jeremy A. Draghi

3 Dept. of Biological Sciences, Virginia Tech, Blacksburg, VA 24060 USA

4 [jdraghi@vt.edu](mailto:jdraghi@vt.edu)

5 **Abstract**

6 Many ideas about the evolution of specialization rely on trade-offs—an inability for one  
7 organism to express maximal performance in two or more environments. However,  
8 optimal foraging theory suggests that populations can evolve specialization on a  
9 superior resource without explicit trade-offs. Classical results in population genetics  
10 show that the process of adaptation can be biased toward further improvement in  
11 already productive environments, potentially widening the gap between superior and  
12 inferior resources. Here I synthesize these approaches with new insights on evolvability  
13 at low recombination rates, showing that emergent asymmetries in evolvability can push  
14 a population toward specialization in the absence of trade-offs. Simulations are used to  
15 demonstrate how adaptation to a more common environment interferes with adaptation  
16 to a less common but otherwise equal alternative environment. Shaped by  
17 recombination rates and other population-genetic parameters, this process results in  
18 either the retention of a generalist niche without trade-offs or entrapment at the local  
19 optimum of specialization on the common environment. These modeling results predict  
20 that transient differences in evolvability across traits during an episode of adaptation  
21 could have long-term consequences for a population’s niche.

22

23

24

25

## Introduction

26 Species have limits that emerge from complex evolutionary processes. The breadth of a  
27 niche is proscribed by competition with other species, but also by constraints internal to  
28 the population: for example, limits to local adaptation in the face of gene flow  
29 (Kirkpatrick & Barton 1997). Variation in niche breadth is a key dimension of  
30 biodiversity, and is typically quite high (Poisot et al. 2015) but is declining as specialists  
31 are disproportionately at risk due to environmental change (Clavel et al. 2011).

32 Understanding how organisms evolve to be specialists and what causes a niche to  
33 expand or contract is major goal of evolutionary ecology. While these questions are  
34 long-standing, evolution experiments focusing on niche breadth or host range, often in  
35 microbes (Kassen 2002), have helped to highlight the many gaps in how we think about  
36 evolution of the niche (Bono et al. 2020).

37

38 One highly influential explanation for restricted niche breaths is that they are limited by  
39 trade-offs, such that specialists can exceed the performance of generalists where their  
40 niches overlap. Despite the intuitive appeal of trade-offs, empirical evidence that they  
41 actually explain niche breadths has been hard to find (Futuyma & Moreno 1988; Fry  
42 1996; Remold et al. 2012). This gap has motivated the search for alternative theories  
43 that incorporate behavior, population genetics, and macroevolution into a synthetic  
44 theory of niche limits (Poisot et al. 2011; Sexton et al. 2017).

45

46 A major insight from population-genetic models of niche breadth is that the evolution of  
47 preference for a particular habitat, and performance in that habitat, can be linked in a

48 positive feedback loop (Holt 1985; Crespi 2004). Such models elaborate upon optimal  
49 foraging perspectives by allowing the value of resources to change with an organism's  
50 degree of local adaptation, with these changes feeding back to determine which  
51 preferences are optimal (Futuyma & Moreno 1988). The cause of this feedback is that  
52 the intensity of selection to maintain and improve performance in a specific habitat is  
53 proportional to the number and reproductive success of organisms within it (Holt &  
54 Gaines 1992). This concept is identical to the more familiar example of weakening  
55 selection with increasing age due to declining reproductive value of later age classes;  
56 essentially, rarely encountered or unproductive environments are similar to rarely  
57 attained or less fecund age classes (Holt 1996a). If organisms evolve to prefer a habitat  
58 that confers greater reproductive success, then the accompanying shift in the focus of  
59 selection may, over time, further boost their fitness in the favored habitat. This  
60 prediction that stronger selection improves the degree of adaptation is quite general,  
61 emerging from models of trade-offs, but also from models where performance in each  
62 environment depend on independent sets of traits (e.g., Kawecki et al. 1997). Improved  
63 adaptation in one environment can then drive still greater levels of preference,  
64 completing the feedback loop. In such models, specialization can therefore arise from  
65 even minor asymmetries in performance across a broad niche (Fry 1996).

66

67 Any model of niche breadth that considers both performance traits and habitat selection  
68 incorporates this positive feedback loop. Such models are plentiful and highly diverse  
69 (see reviews in Futuyma & Moreno 1988; Wilson & Yoshimura 1994; Ravigné et al.  
70 2009), but most inherit the idea from Levins (1962) of representing trade-offs with, in

71 two dimensions, a curve of the maximum fitness in one environment given each  
72 possible fitness in the other environment (essentially, a Pareto front—see Shovel et al.  
73 2012). Evolution of the degree of specialization can then be envisioned as movement in  
74 a single dimension, constrained to this curve of optimal combinations of fitnesses.  
75 Modeling two dimensions of performance in a single variable is an appealing  
76 simplification, but cannot adequately represent a scenario in which a population is  
77 suboptimally adapted to both environments. This scenario might arise when an invasive  
78 species adapts to the multiple novelties of a new environment (Prentis et al. 2008) or as  
79 a result of antagonistic coevolution with multiple hosts or prey species (e.g., Hall et al.  
80 2011). In these circumstances, the rate of adaptive evolution, or evolvability, in each  
81 environment can now dynamically shape the value of each environment for reproductive  
82 success, and could therefore drive evolution of preferences for those environments.  
83  
84 Motivated by mixed evidence for trade-offs, a number of papers have explored the idea  
85 that generalists may suffer deficits in evolvability, even when trade-offs are avoided by  
86 virtue of separate genetic bases for performance in each environment (Kawecki 1994;  
87 Fry 1996; Holt 1996b; Whitlock 1996). Because generalists experience selection in  
88 multiple environments, the strength of selection for performance in any one of those  
89 environments is weaker in comparison to a specialist population that only reproduces in  
90 that single environment. This is fundamentally the same idea as the positive feedback  
91 between preference and performance discussed above, and this connection has led to  
92 predictions that, without trade-offs, specialists may replace generalists because they  
93 can adapt faster (Kawecki 1998) or because generalists cannot maintain fitness for rare

94 environments in the face of deleterious mutation (Kawecki et al. 1997). While intriguing,  
95 these findings preceded the development of our modern concept of evolvability and its  
96 determinants, and haven't shown that specialists can evolve with both the absence of  
97 trade-offs and the presence of substantial ecological costs of specialism, such as the  
98 search costs which are typically associated with a narrow niche in classical models of  
99 optimal foraging (Charnov 1976; Rosenzweig 1981).

100

101 Here, I show that specialization can evolve as initially generalist populations adapt to  
102 improve fitness in two environments, and that this adaptive specialization can occur  
103 without trade-offs and with substantial search costs imposed on specialists. Populations  
104 can evolve a reduction in their niche that is adaptive, in the sense that a sequence of  
105 beneficial mutations can lead a population to a local optimum of specialism. However,  
106 the fitness landscape allows for no-cost generalists that are competitively superior to  
107 any specialist; specialism therefore represents a local, inferior optimum. A population's  
108 chance of adapting to this local optimum, and therefore specializing on the more  
109 common environment, is primarily driven by the relative evolvability of its performance in  
110 each environment, with recombination between the genetic bases of each trait emerging  
111 as a major determinant of whether populations retain generalism.

112

113 Recombination helps maintain generalism because it alleviates a type of clonal  
114 interference—competition between beneficial mutations that are simultaneously  
115 polymorphic (Gerrish & Lenski 1996)—that further impedes adaptation in traits with  
116 already low evolvability. Recent theory focusing on asexual evolution has predicted that

117 adaptation among sites with small selection coefficients can be effectively stalled by  
118 interference from rapidly evolving sites with larger effects (Schiffels et al. 2011). Gomez  
119 et al. (2020) show that a trait with more frequent or larger beneficial mutations can  
120 effectively stall adaptation in a trait with lower evolvability, an effect that Venkataram et  
121 al. (2019) recently demonstrated experimentally. Here I apply these ideas to differences  
122 in evolvability that arise from variation in the frequency of two environments, with no  
123 other intrinsic differences in their quality. This scenario represents a challenging case  
124 for specialization, as both resources have identical initial and potential values.  
125 Specialization is seen to evolve when the less common environment becomes  
126 unprofitable in comparison to the more common environment, solely because of slow  
127 relative improvement in how organisms can exploit the rare environment. These results  
128 demonstrate the value of synthesizing our emerging understanding of evolvability with  
129 classical eco-evolutionary questions about the evolution of the niche.

130

## 131 **Model**

### 132 **Overview of Ecology & the Life Cycle**

133 The basic Wright-Fisher model was modified to allow for a potentially costly preference  
134 for the common environment, while retaining several traditional components of the  
135 model: non-overlapping generations and construction of a fixed number of adults via  
136 random sampling from an unlimited pool of gametes, producing approximately Poisson-  
137 distributed variation in reproductive success. Each organism has three traits—a  
138 preference trait ( $f$ ) and two performance traits,  $w_A$  and  $w_B$ —that are entirely determined  
139 genetically by three sets of distinct loci. The number of adults is limited to a carrying

140 capacity  $K$ ; each of these individuals then attempts to settle in a habitat of either  
141 environment A or B, as described below. The expected fecundity of an individual  $i$  in  
142 environment  $x$  is then:

143

$$E(W_{i,x}) = \frac{w_{i,x}}{\sum_{i \in \alpha} w_{i,A} + \sum_{i \in \beta} w_{i,B}} K \quad \text{Eq. 1}$$

144 As implied by Eq. 1, the preference trait has no direct effect on fitness. Here  $\alpha$  is the set  
145 of individuals that have settled in habitats of environment A, and  $\beta$  is the set in  
146 environment B. Because of search costs, as detailed below,  $|\alpha| + |\beta| \leq K$ ; that is, the  
147 total number of individuals settled in each environment is no greater than  $K$ , but can be  
148 less than that. Following the taxonomy summarized in Ravigne et al. 2009, this is a  
149 model with global regulation of population size and variable habitat outputs; it is  
150 therefore a model of 'hard selection,' which generally is more likely to permit the  
151 success of specialists (Futuyma & Moreno 1988).

152

153 In fully asexual simulations, the fecundities given by Eq. 1 are then used as weights in a  
154 multinomial distribution from which  $K$  parents are selected, with replacement, to  
155 reproduce and form the next generation. In simulations with recombination,  $2K$  parents  
156 are drawn with replacement, and offspring are determined via the linkage relationships  
157 described below. To avoid confounds in comparing asexual and sexual populations, all  
158 organisms modeled here are haploid.

159

160 **Environment Preference & Specialism**



161 For simplicity, I focus here on scenarios in which environment A is more commonly  
162 encountered than environment B, and in which the preference trait causes aversion to  
163 the rarer environment (and therefore, a preference for the common environment A). The  
164 preference trait  $f$  is therefore treated as a probability to reject environment B when  
165 encountered, with a value of zero representing unbiased generalism and a value of one  
166 representing complete specialization on environment A. While it would be  
167 straightforward for future work to extend this model to allow preferences for either  
168 environment to evolve, this complication isn't necessary to model the process of  
169 specialization on the common environment. Therefore, the model is designed  
170 asymmetrically and does not allow an environment-B specialist to evolve.

171  
172 Each adult searches for a habitat, encountering environment A with probability  $1 - p$  and  
173 environment B with probability  $p$ , where  $p < 0.5$ . These encounter probabilities are  
174 independent of genotype. If  $f > 0$ , then an individual will reject environment B with  
175 probability  $f$  and then experience a cost of searching,  $c$ , representing the probability of  
176 death while searching for a new habitat. If the individual avoids death it once again may  
177 encounter environment A with probability  $1 - p$  or environment B with probability  $p$ , and  
178 may again reject B with probability  $f$ ; this search process continues until each individual  
179 has perished or been assigned to an environment. The probabilities of assignment to A,  
180 B, or death are given by the sums of geometric series as follows:

$$P(A) = \frac{1 - p}{1 - p f (1 - c)}$$

$$P(B) = \frac{p(1 - f)}{1 - p f (1 - c)}$$

Eqs. 2a-c

$$P(\text{death}) = \frac{pfc}{1 - pf(1 - c)}$$

181 This model of search costs is similar to Forbes et al. (2017), but is generalized to allow  
182 a probabilistic preference.

183

184 Mean fitness of a given genotype can then be written as a sum of Eqs. 2a and 2b,  
185 weighted by that genotype's fitness in those environments.

186

$$E(w) = \frac{1 - p}{1 - pf(1 - c)} w_A + \frac{p(1 - f)}{1 - pf(1 - c)} w_B \quad \text{Eq. 3}$$

187 The derivative of Eq. 3 with respect to  $f$  at  $f = 0$  is positive when the following inequality  
188 is met:

189

$$(1 - c)(1 - p)w_A > (1 - p(1 - c))w_B \quad \text{Eq. 4}$$

190 We can therefore predict that specialization begins to be favorable when Eq. 4 is true.

191

192 Two simplifications of Eq. 4 help establish some intuition. When  $c$  is zero, then  
193 specialism on A can start to evolve whenever  $w_A > w_B$ . When, instead,  $p$  is small we  
194 can approximate the condition in Eq. 4 as  $(1 - c)w_A > w_B$ ; that is, specialism starts to  
195 be favorable when it is more profitable to risk death than to settle for environment B.

196

## 197 **Genetic Bases of Traits & Mutation**

198 Fitness in environment A,  $w_A$ , is determined by a set of loci  $G_A$ . This set consists of  $L$   
199 linked loci, each with two possible alleles and each with a fitness difference of  $s_A$

200 between them. Fitness effects combine multiplicatively across loci. Fitness in  
201 environment B is determined in exactly the same way, by an independent set of  $L$  loci  
202  $G_B$  with fitness difference  $s_B$  between the alleles at each locus.  $G_A$  has no effect on  
203 fitness in environment B and vice versa. Within a set each locus is interchangeable with  
204 the others, so we can fully represent the genotypic basis of fitness for, say, environment  
205 A, by the number of beneficial alleles,  $g_A$ , it contains.

206  
207 A preference locus, represented by a single number in  $[0,1]$ , is also encoded in each  
208 genotype. In simulations with linkage, all these elements are considered to be on the  
209 same chromosome in the order of the preference locus,  $G_A$ , and  $G_B$ . This is clearly not  
210 realistic for polygenic traits; the model is best seen as representing complete linkage  
211 with specific, purposeful deviations from that pattern. Linkage between  $G_A$  and  $G_B$  is a  
212 focus of the model, while linkage between the preference locus and  $G_A/G_B$  is a nuisance  
213 factor—therefore, in some simulations the preference locus is modeled as if it is on an  
214 independent chromosome to assess the impact of this choice.

215  
216 Mutation of the preference locus is implemented by simply redrawing the value from a  
217 uniform distribution. For  $G_A$  and  $G_B$ , an additional parameter,  $b$ , is introduced that  
218 reflects a bias in favor of deleterious mutation. Smaller values of  $b$  decrease the chance  
219 that mutation will produce the beneficial allele. The probability that a mutation in  $G_A$  is  
220 beneficial (increasing  $g_A$ ) is  $p_{bene}(g_A) = \frac{L-g_A}{L}b$ , the probability that it is deleterious  
221 (decreasing  $g_A$ ) is  $p_{del}(g_A) = \frac{g_A}{L}$ , and remaining mutations are neutral. As a

222 consequence, the rate at which new beneficial mutations arise decreases linearly with  
223 the degree of adaptation.

224

225 The number of mutations in each trait in a generation is drawn from a Poisson  
226 distribution with a mean of  $\mu_{\text{pref}}N$  for the preference trait,  $\mu_A N$  for  $G_A$  and  $\mu_B N$  for  $G_B$ .

227 Individuals are selected to receive mutations with replacement.

228

### 229 **Density dependence**

230 In the absence of any habitat preferences, we expect  $(1-p)K$  adults to reproduce in  
231 environment A and  $pK$  in environment B. We refer to these values as the neutral  
232 expectations for densities in each environment. I implemented density-dependence  
233 growth as a discrete option: either density in each habitat was ignored, as described  
234 above, or a density higher than the neutral expectation for that environment caused  
235 reduced reproduction for everyone in that environment. The reduction in growth was  
236 calculated to be proportional to the percentage by which density exceeded the neutral  
237 expectation. If  $N_A$  is the number of breeding adults in environment A and adults  
238 encounter environment A with probability  $p$ , then reproduction in environment A was  
239 divided by a factor  $N_A/(1-p)K$  whenever  $N_A > (1-p)K$ . If  $N_A$  did not exceed  $(1-p)K$  then  
240 fitness was calculated normally—there was no positive effect of low density. The  
241 corresponding calculation was also performed for environment B; by definition, only one  
242 environments could suffer negative density dependence in a given generation.

243

### 244 **Simulation approach**

245 Aside from Eq. 4, all other results are the products of individual-based simulations.  
246 Simulations were written in R with integrated C++ algorithms for the sake of speed. In  
247 general, between 250 and 1000 replicates were performed for each treatment;  
248 confidence intervals are included in all figures in which they are not negligible. All code  
249 will be made publicly available upon publication.

250

| Symbol              | Description                                                                                         |
|---------------------|-----------------------------------------------------------------------------------------------------|
| $w_A, w_B$          | Fitnesses in environments A and B.                                                                  |
| $G_A, G_B$          | Sets of loci determining fitness in environments A and B.                                           |
| $\mu_{\text{pref}}$ | Rate of mutations in the preference trait per individual per generation.                            |
| $\mu_A, \mu_B$      | Rates of mutations in the sets of loci determining $w_A$ and $w_B$ , per individual per generation. |
| $g_A, g_B$          | Numbers of beneficial alleles in $G_A$ and $G_B$ for a given genotype.                              |
| $f$                 | Probability of rejecting environment 2 for a given genotype.                                        |
| $K$                 | Carrying capacity.                                                                                  |
| $N$                 | Number of adults settled in habitats of environment A or B                                          |
| $c$                 | Search cost, equal to the chance of dying while seeking another habitat.                            |
| $p$                 | Frequency of encountering environment B.                                                            |

251 **Table 1:** Important parameters.

252

253

## Results

254 **Linkage between the genetic bases of traits promotes adaptive aversion to the**

255 **rare environment**

256 To understand how performance in each environment was shaped by adaptation to the  
257 other, I first performed simulations in generalists that could not evolve into specialists  
258 (i.e.,  $\mu_{\text{pref}} = 0$ ). In large populations ( $K = 10,000$ ) in which environment B was  
259 encountered by 25% of individuals ( $p = 0.25$ ), the initial founders had with equal  
260 fitnesses in each environment. Performance in each environment was determined by a  
261 distinct set of one hundred loci ( $L = 100$ ) for each environment. At each of these two  
262 hundred loci, one of two alleles conferred a small, multiplicative benefit ( $s = 0.01$ ) in the  
263 corresponding environment. For the set of loci corresponding to environment A, all  
264 alleles are neutral in environment B, and vice versa. Therefore, there are no genetic  
265 trade-offs in performance across the environments, and no-cost generalists are  
266 possible. The starting genotype had an initial fitness of approximately 0.5 in each  
267 environment. Populations were then allowed to improve performance in one or both  
268 environments, by setting the mutation rates to ( $\mu_A = 5 \times 10^{-4}$ ,  $\mu_B = 0$ ), ( $\mu_A = 0$ ,  $\mu_B = 5 \times$   
269  $10^{-4}$ ), or ( $\mu_A = 5 \times 10^{-4}$ ,  $\mu_B = 5 \times 10^{-4}$ ).

270

271 Figure 1 plots mean fitness in each environment across four hundred replicates,  
272 comparing fitness in each environment when that trait evolves alone (no genetic  
273 variation in the other trait) versus when it evolves simultaneously with the other fitness  
274 trait. Adaptation to the more common environment (environment A) is unaffected by  
275 simultaneous adaptation to the less common environment. However, with complete  
276 linkage ( $r = 0$ ), adaptation to the less common environment is greatly slowed when the  
277 population is also adapting to environment A; this slowdown is largely but not entirely  
278 eliminated with free recombination between the genetic bases of each trait,  $G_A$  and  $G_B$ .

279 (Loci within each block are still completely linked). Recombination does not eliminate all  
280 interference between traits because the strength of selection in an environment is still  
281 dependent on that environment's contribution to the total pool of offspring;  $w_A$  increases  
282 faster than  $w_B$  because  $p < 0.5$ , leading to weakening selection on  $w_B$  as the simulation  
283 progresses.  
284

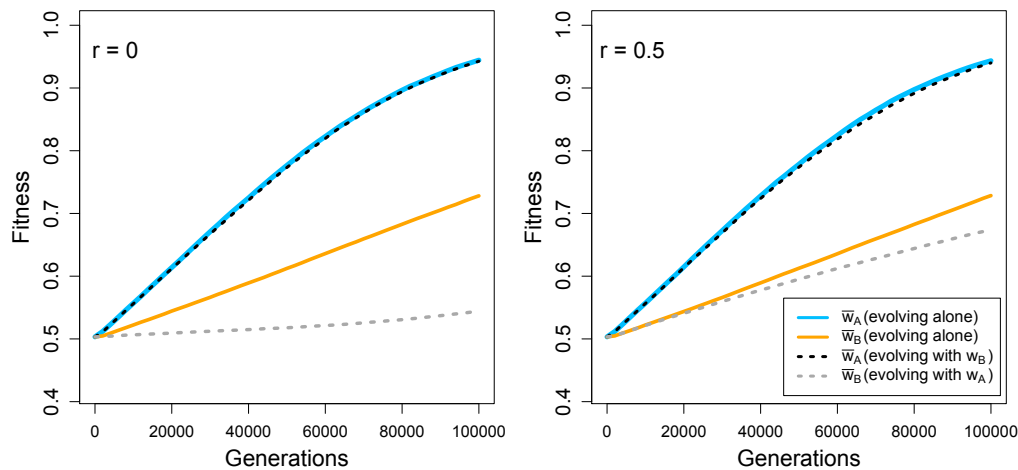

285  
286 **Figure 1:** Mean fitness in each environment when each performance trait evolves alone  
287 (solid lines) or together (dotted lines). *Left:* No recombination between the sets of loci for  
288 performance in each environment ( $r = 0$ ). *Right:* Full recombination between sets of loci  
289 (but still complete linkage within each set of loci). Four hundred replicates are averaged;  
290 95% confidence intervals (not plotted) span less than 0.01 units on the y-axis.  $K =$   
291 10,000,  $L = 100$ , mutation per locus is either  $5 \times 10^{-4}$  (when allowed to evolve) or zero  
292 (when not allowed to evolve).  
293

294 To understand how these asymmetries in evolvability interact with the evolution of  
295 preference, I performed simulations in which the preference trait was also allowed to  
296 evolve. Figure 2 shows two depictions of the same four representative examples of

297 simultaneous evolution of all three traits. Fig. 2A plots the ratio of mean fitnesses,  
298  $\bar{w}_A/\bar{w}_B$ , as both adapt. Evolution of the preference, depicted with the changing colors in  
299 Fig. 2, is predicted by the horizontal dashed line drawn from Eq. 4. Fig. 2B shows the  
300 same data with each performance trait shown on its own axis, with the line defined by  
301 Eq. 4 now appearing as a diagonal line.  
302

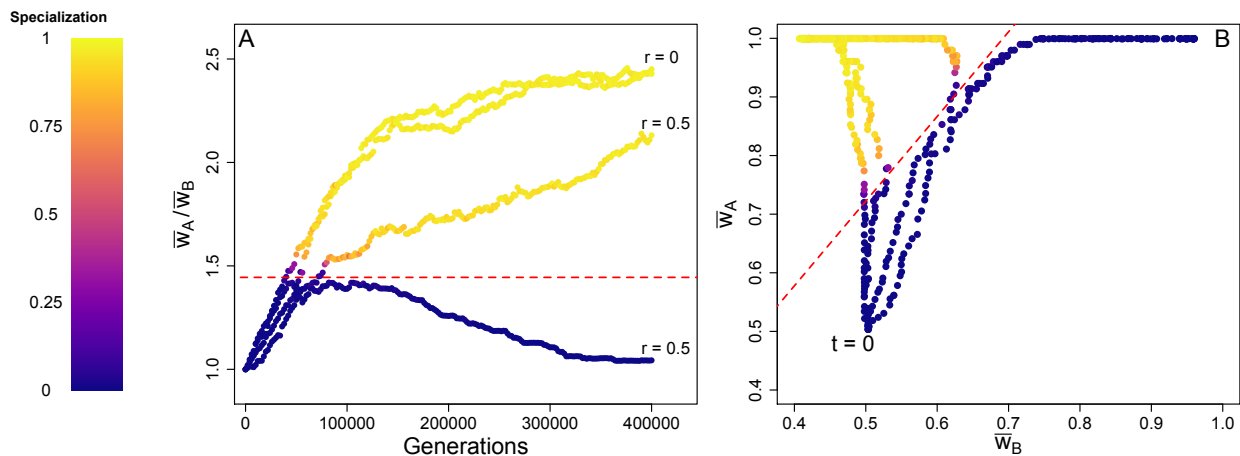

303  
304 **Figure 2:** Representative samples of fitness evolution with complete linkage ( $r = 0$ ) and  
305 free recombination between the genetic bases of fitness in environment A and B ( $r =$   
306  $0.5$ ). Each point is a mean over all individuals in a single replication population.  
307 Specialization is measured as the fraction of the population with a strong preference for  
308 environment A (90% chance or greater to reject environment B when encountered).  $K =$   
309  $10,000$ ,  $L = 100$ ,  $\mu_A = 5 \times 10^{-4}$ ,  $\mu_B = 5 \times 10^{-4}$ ,  $\mu_{\text{pref}} = 0.001$ ,  $p = 0.25$ , and  $c = 0.25$ .

310  
311 The examples in Fig. 2 illustrate how asymmetries in evolvability can lead to  
312 specialization, as well as the positive feedback that can lock in a narrow niche and  
313 prevent the emergence of a superior generalist genotype. These positive feedbacks are  
314 evident in the further skewing of the ratio of fitness after environmental preference



315 evolves; as seen in Fig. 2B, fitness in environment B can decay below its initial level  
316 even as fitness in environment A is maximized. Note that such decay is expected  
317 because the deleterious rate is higher than the rate for beneficial mutations.

318

319 To further explore these results, I next focused on the quantitative effect of  
320 recombination. Figure 3 sweeps across a range of prevalences of environment B as  
321 well as intermediate levels of recombination. A population is classified as “specialist” if  
322 at least 90% of the individuals reject environment B with at least a 90% chance. Given  
323 that the model implements hard selection, frequency-dependent polymorphisms are not  
324 expected and this unidimensional measure is appropriate. However, these thresholds  
325 are obviously somewhat arbitrary, and increasing the required number of specialist  
326 individuals does have an effect on the outcomes, particularly at small values of  $p$  when  
327 selection on environment preference is weak (Supplemental Figure S1). Regardless,  
328 there is a clear overall pattern: recombination lowers the chance of niche reduction,  
329 allowing initial generalists to maintain that generalism as they adapt across a larger  
330 range of prevalences of the rare environment.

331

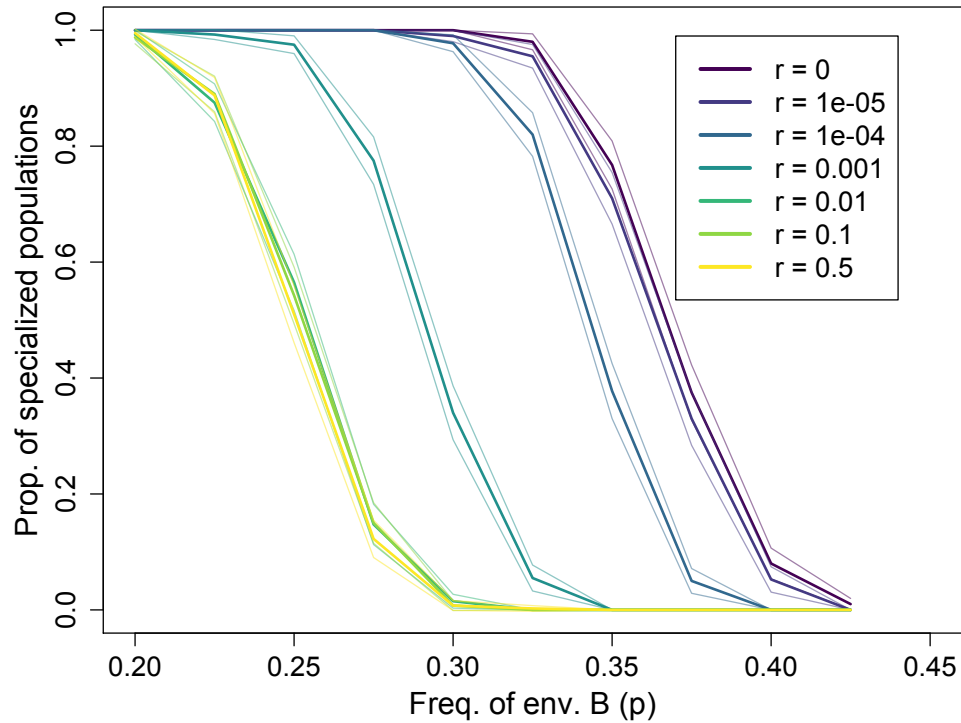

332

333 **Figure 3:** Evolved niche breadths across a range of values of  $p$  ( $x$ -axis) and  $r$  (colors). A

334 population is classified as ‘specialists’ if at least 90% of individuals have at least a 90%

335 rejection rate for the less common environment B. Thin lines indicate 95% confidence

336 intervals based on the Normal approximation. Four hundred replicates were performed

337 for each combination of parameters. As above,  $K = 10,000$ ,  $L = 100$ ,  $\mu_A = 5 \times 10^{-4}$ ,  $\mu_B = 5$

338  $\times 10^{-4}$ ,  $\mu_{\text{pref}} = 0.001$ , and  $c = 0.25$ .

339

340 Figure 2 hints that specialization, once evolved, may persist after adaptation is over; I

341 next validated this prediction for the set of simulations in Fig. 3. Among those

342 populations (twenty-eight thousand populations across all treatments), over 99% could

343 be classified as either specialist (containing at least 90% of individuals with a preference

344 of at least 0.9 for environment A) or generalist (containing at most 10% of such

345 specialist individuals) by generation 200,000. By the end of the simulations, at

346 generation 400,000, every population could be classified as one or the other extreme.  
347 Moreover, none of the populations classified as generalist or specialist at the midpoint  
348 had changed their classification by the end. This stability indicates that while the  
349 process of adaptation was transient, its effects on preferences and therefore the utilized  
350 niche were long-lasting. These results also confirm that polymorphisms do not persist  
351 indefinitely under the conditions simulated here.

352

353 In Figure 3, recombination between the preference locus and the neighboring block of  
354 loci for performance in environment A also varies based on the stated  $r$  values.  
355 Additional simulations with free recombination between the preference locus and  
356 performance loci yield indistinguishable results (Supplemental Figure 2), confirming that  
357 the effect of recombination in Fig. 3 is caused by relieved interference between the  
358 genetic bases of performance in the two environments.

359

### 360 **The propensity for adaptive specialization is sensitive to determinants of** 361 **evolvability**

362 Schiffels et al.'s (2011) study of clonal interference predicted that the fixation rate of the  
363 largest-effect beneficial mutations sets the scale of emergent neutrality—greatly  
364 weakened effective selection on mutations with smaller effects. Much like the classical  
365 result that mutations with an  $s$  of much less than  $1/N$  (in haploids where  $N_e$  equals  $N$ )  
366 are effectively neutral (Kimura 1968), Schiffels et al. update this relationship to predict  
367 that competing mutations in asexual populations are emergently neutral if  $s$  is much less  
368 than  $1/N + V_{\text{drive}}$ , where  $V_{\text{drive}}$  is the substitution rate of the large-effect, driver mutations.

369

370 In assessing the causes and generality of asymmetric evolvability and the resulting  
371 evolution of specialism, I applied the results of Schiffels et al. (2011) to make three  
372 predictions for the model here. First, in asexual populations, increasing  $N$  or  $\mu$  will  
373 worsen clonal interference and exacerbate the asymmetry between the rates of  
374 evolution in the common and rare environment. Second, the rate of fixation of beneficial  
375 mutations in the common environment will correlate with the asymmetry of adaptation  
376 and the propensity of specialism to evolve. Third,  $V_{\text{drive}} + 1/N$  will predict the degree of  
377 asymmetric evolvability by determining how much the rate of improvement in  $w_A$  causes  
378 improvement in  $w_B$  to lag.

379

380 Figure 4 shows that the product  $N\mu$  does correlate positively in the absence of  
381 recombination with both asymmetry of adaptation rates (4A), and the probability for  
382 asexuals to evolve specialism (4C). Across experiments with different values of  $N\mu$ ,  
383 there is also the expected negative relationship between  $V_{\text{drive}} + 1/N$  and asymmetry  
384 (4B). However, increasing  $N$  and decreasing  $\mu$  while maintaining their product,  $N\mu$ , does  
385 result in greater asymmetry and probability of specialization, and a lower value of  $V_A$ ,  
386 contrary to the expectation derived from Schiffels et al. (2011). While  $w_B/w_A$  is a good  
387 predictor of the probability to evolve specialism (4C),  $V_{\text{drive}} + 1/N$  does not capture the  
388 same information (4D). Note as well that the realized selection coefficient in generalists  
389 for adaptive mutations in environment B for asexuals is approximately the product of  $p$   
390 and  $s$ , which is about 0.0025 for the results shown here. This is larger than any values  
391 of  $V_{\text{drive}} + 1/N$  achieved in these simulations; therefore, Fig. 4B&D should be seen as

392 attempting to extrapolate Schiffels et al.'s prediction of an emergent neutrality threshold  
 393 to predict evolutionary stalling for larger-effect mutations, and not as a test of their own  
 394 claims for their result. Together, these results confirm the first two predictions derived  
 395 from Schiffels et al. (2011), while illustrating that the broader phenomenon of  
 396 evolutionary interference between traits is not yet fully understood.  
 397

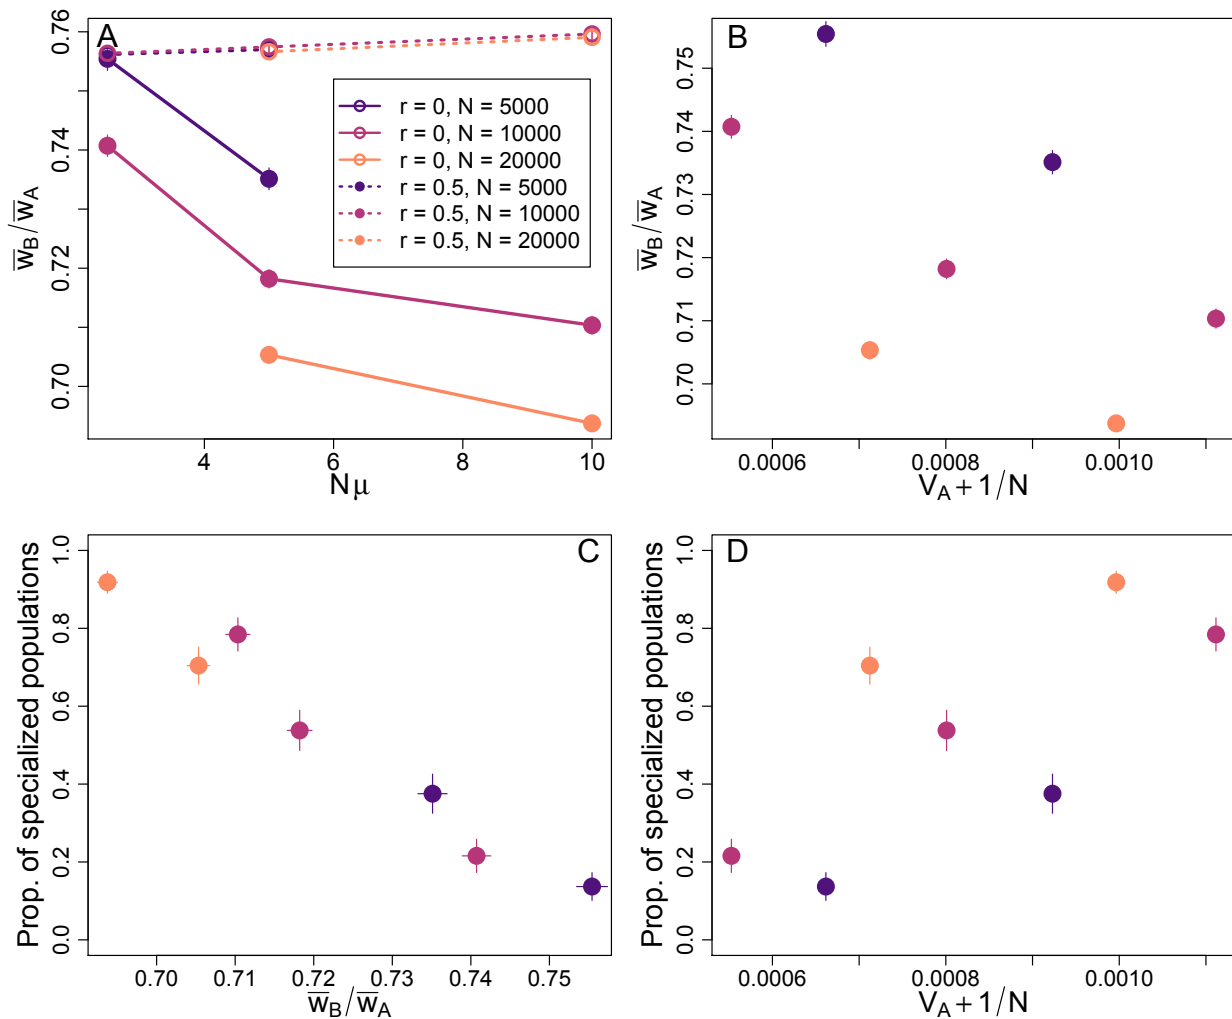

398  
 399 **Figure 4:** Asymmetry of adaptation, predicted neutrality threshold, and the fraction of  
 400 specialists for combinations of  $N$  and  $\mu$ . *Panel A:* With complete linkage, the ratio of  
 401 fitness in environment B over environment A generally declines with increases in the

402 product  $N\mu$  (where  $\mu = \mu_A = \mu_B$ ), indicating greater asymmetry of evolvability. Without  
403 linkage, there is no negative trend and sensitivity of the ratio to  $N\mu$  is very low. The ratio  
404 of fitnesses is the grand mean of the means of populations, each assayed when the  
405 mean of  $w_A$  crosses 0.8 (as determined by linear interpolation). *Panel B*: The ratio of  
406 fitnesses compared to the emergent neutrality predictor of substitution rate of  
407 adaptations in  $w_A$  plus the reciprocal of population size. Here and below, only the  
408 treatments with complete linkage are shown due to the lack of any substantial response  
409 of  $w_B/w_A$  to  $N\mu$  in populations without linkage. *Panels C and D*: Fraction of replicate  
410 populations that end their simulations as specialists, by the criteria applied above (e.g.,  
411 Figure 3), plotted against the ratio of fitnesses and the emergent neutrality threshold. As  
412 above,  $L = 100$  and  $c = 0.25$ .  $w_B/w_A$  and  $V_{\text{drive}}$  are measured in simulations with  $\mu_{\text{pref}} = 0$   
413 to avoid any confound caused by the evolution of specialism; fraction specialists is  
414 measured in separate simulations with  $\mu_{\text{pref}} = 0.001$ . Values of  $p$  were chosen for  $r = 0$   
415 and  $r = 0.5$  in which the fraction of populations evolving to specialists was approximately  
416 0.5 when  $K = 10,000$  and  $\mu_A = 5 \times 10^{-4}$ ,  $\mu_B = 5 \times 10^{-4}$ ; these values were  $p = 0.251$  for  $r =$   
417 0 and  $p = 0.367$  for  $r = 0.5$ , as estimated from the data in Figure 3.

418

419 Consideration of  $V_{\text{drive}}$  also motivates an exploration of how these results depend on the  
420 genetic architecture of fitness: specifically, how would  $V_{\text{drive}}$  and the probability of  
421 specialization change if each trait were determined by fewer loci of larger effect? Figure  
422 5 shows that the probability of the evolution of specialism is generally robust to  
423 increasing  $s$  and decreasing  $L$  (such that  $sL$  remains equal to 1). Genetic architectures  
424 with fewer loci of larger effect adapt faster, as evident in Fig. 5B; this may be explained  
425 by the fact that the chance that a beneficial mutation escapes loss by drift increases

426 approximately linearly for values of  $s$  in the range explored here. The evolution of  
 427 specialism is well-predicted by the ratio of fitness gains and by  $V_{\text{drive}} + 1/N$  in  
 428 populations with complete linkage, though not in populations with free recombination  
 429 between the determinants of each trait. Populations with high values of  $s$  adapt much  
 430 faster—when  $r = 0.5$ , populations achieve a mean  $w_A$  of 0.8 in about 56,000 generations  
 431 when  $s = 0.01$  but only about 2800 generations when  $s = 0.05$ , with a similar pattern of  
 432 about 67,000 generations at  $s = 0.01$  and 3300 at  $s = 0.05$  for  $r = 0$ . The window of time  
 433 for evolution of specialization is therefore likely to be much lower with large  $s$ , though  
 434 why this shorter window might affect populations with recombination specifically (Fig.  
 435 5D) is not clear.

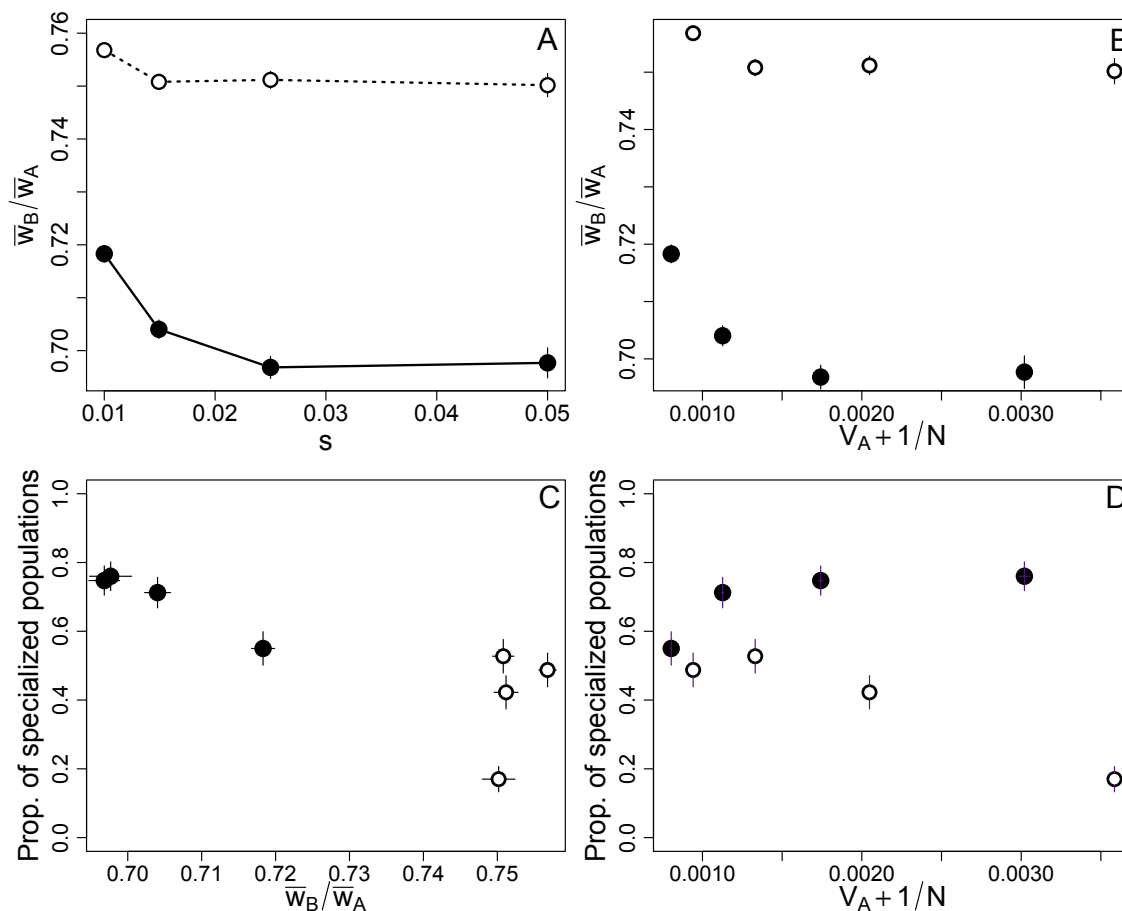

436

437 **Figure 5:** Asymmetry of adaptation, predicted neutrality threshold, and the fraction of  
438 specialists for combinations of  $s$  and  $L$ . *Filled circles:*  $r = 0$ ; *open circles:*  $r = 0.5$ . For  
439 each tested value of  $s$ ,  $L$  is reduced proportionally so that  $sL = 1$ ;  $k$ , the number of  
440 beneficial alleles for initial genotypes, is also adjusted so that each treatment begins at  
441 approximately 50% of maximal fitness in each environment. *Panel A:* The ratio of fitness  
442 in environment B over environment A is maintained or slightly declines with increases in  
443  $s$  (where  $s = s_A = s_B$ ). The ratio of fitnesses is the grand mean of the means of  
444 populations, each assayed when the mean of  $w_A$  crosses 0.8 (as determined by linear  
445 interpolation). *Panel B:* The ratio of fitnesses compared to the emergent neutrality  
446 predictor of substitution rate of adaptations in  $w_A$  plus the reciprocal of population size.  
447 *Panels C and D:* Fraction of replicate populations that specialized, by the criteria applied  
448 above (e.g., Figure 3), plotted against the ratio of fitnesses and the emergent neutrality  
449 threshold.  $K = 10,000$ ,  $\mu_A = 5 \times 10^{-4}$ ,  $\mu_B = 5 \times 10^{-4}$ ,  $c = 0.25$ .  $w_B/w_A$  and  $V_{drive}$  are  
450 measured in simulations with  $\mu_{pref} = 0$  to avoid any confound caused by the evolution of  
451 specialism; the proportion of specialized populations is measured in separate  
452 simulations with  $\mu_{pref} = 0.001$ . Values of  $p$  were chosen for  $r = 0$  and  $r = 0.5$  in which the  
453 fraction of populations that specialized was approximately 0.5 when  $K = 10,000$  and  $\mu_A =$   
454  $5 \times 10^{-4}$ ,  $\mu_B = 5 \times 10^{-4}$ ; these values were  $p = 0.251$  for  $r = 0$  and  $p = 0.367$  for  $r = 0.5$ , as  
455 estimated from the data in Figure 3.

456

## 457 **Negative density dependence restricts but does not eliminate adaptive** 458 **specialization**

459 In addition to search costs, organisms might also suffer negative effects of crowding  
460 that could inhibit specialization. As described in the *Model* section, the number of adults  
461 is regulated to a carrying capacity  $K$  before adults are choose their reproductive



462 environment. Without habitat preferences, we expect  $(1-p)K$  adults to reproduce in  
463 environment A and  $pK$  in environment B. To implement a cost of high densities, I ran  
464 simulations in which fecundity in an environment was reduced if the actual number of  
465 adults in that environment exceeded the expectation without any preferences (see  
466 *Model--Density dependence*). For example, if, due to habitat preference, environment A  
467 contained 20% more adults than the neutral expectation of  $(1-p)K$ , then the fitness of all  
468 individuals in environment A was divided by a factor of 1.2.

469  
470 This form of negative density-dependence should make specialization less profitable  
471 and reduce the likelihood of transitions to specialism. It does—the frequency of the rarer  
472 environment at which 50% of replication populations evolve into specialists ( $p_{50}$ ) is  
473 smaller with crowding effects (Figure 6), indicating that generalism is maintained for a  
474 broader range of conditions. This reduction in the chance of specialists to evolve  
475 appears approximately independent of recombination rate.

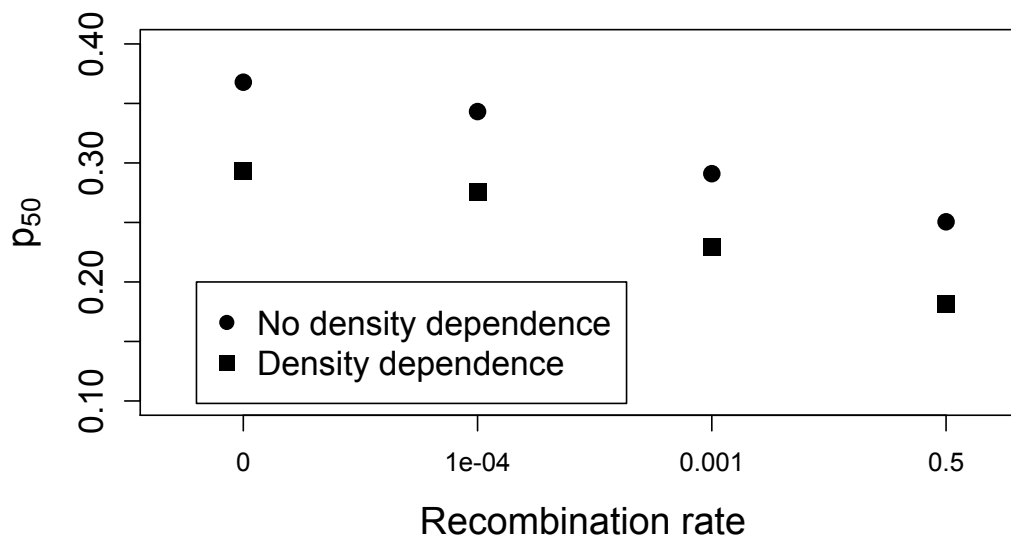

476

477 **Figure 6:** Value of  $p$  for which 50% of populations end the simulations as environment-A  
478 specialists ( $p_{50}$ ) with and without density dependence (squares vs. circles), across four  
479 values of the recombination rate.  $p_{50}$  was calculated by logistic regression; 95%  
480 confidence intervals were estimated by bootstrapping but omitted as they were well-  
481 approximated by the size of the plotting symbols. Data for the "no density dependence"  
482 treatment are the same as those summarized in Figure 3. As above,  $K = 10,000$ ,  $L =$   
483  $100$ ,  $\mu_A = 5 \times 10^{-4}$ ,  $\mu_B = 5 \times 10^{-4}$ ,  $\mu_{\text{pref}} = 0.001$ , and  $c = 0.25$ .

484  
485 Negative density-dependent effects on fitness, as implemented here, could potentially  
486 lead to a frequency-dependent polymorphism of more- and less-specialized strategies.  
487 Such polymorphisms would render the focal summary statistic—fraction of populations  
488 where over 90% of individuals have over a 90% rejection rate of environment B—an  
489 incomplete picture of the evolving populations. However, after 500,000 generations of  
490 evolution, only two treatments out of the 48 combinations of  $r$  and  $p$  examined showed  
491 evidence of intermediate polymorphisms in preference—genotypes with prevalences  
492 over 10% and preferences between 0.1 and 0.9. With  $r = 0.5$ , such polymorphisms were  
493 found in five out of 244 replicates performed with  $p = 0.175$  and nine out of 244  
494 replicates with  $p = 0.2$ . While polymorphisms in preference may play a role during  
495 adaptive evolution, by the end of the simulations most populations were essentially  
496 monomorphic for preference—as was the case without density dependence.

497

## 498 Discussion

499 The rejection of an unprofitable resource is a classical prediction (e.g., MacArthur &  
500 Pianka 1966), and evolved specialization in accordance with this prediction has been

501 demonstrated empirically (Jasmin & Kassen 2007); this finding alone is not the key  
502 message of this paper. Instead, the focus here is on the embedding of this process of  
503 adaptive specialization within a context in which an environment becomes relatively  
504 unsuitable because performance in that environment fails to increase as quickly as  
505 performance in an alternative environment. My approach is more akin to models of  
506 habitat selection, in which populations may either adapt to better exploit unfavorable  
507 environments or to avoid them (Templeton & Rothman 1981; Castillo-Chavez et al.  
508 1988; Rausher 1993; Feder & Forbes 2007; Ravigné et al. 2009). However, here the  
509 initial cause of a failure to adapt to an environment is that environment's rarity,  
510 alongside the potential of ongoing adaptation to a more common environment to  
511 interfere with adaptation to the less common environment. Kawecki et al. (1997) found  
512 that mutation collapse of fitness in an unproductive environment depended only on that  
513 environment's total contribution to the next generation. In contrast, the results here  
514 show adaptive collapse of fitness in environments with substantial initial, and potential,  
515 contributions to reproduction, but poor rates of improvement in that contribution.

516

517 Although rapid evolution is increasingly recognized as a contributor to ecological  
518 processes (e.g., Thompson 1998), much less is said about how the determinants of  
519 evolvability could explain patterns of biodiversity (but see Poisot et al. 2011). One  
520 argument is that regardless of whether adaptation is fast or slow, populations will still  
521 arrive at the same traits. This view is challenged by a primary role of rates of  
522 adaptations in a number of important scenarios: evolutionary rescue of populations  
523 fated for extinction (Bell 2017), rapid evolution in invasive species (Stapley et al. 2015),

524 assembly of communities (Kremer & Klausmeier 2017), host-pathogen coevolution  
525 (Abrams & Matsuda 1997; Cortez & Weitz 2014; Hiltunen et al. 2014), and coexistence  
526 among competitors (Lankau 2011). The results here add another such scenario, in  
527 which a type of “race” between the performances of two adapting traits can decide  
528 which of two distinct, stable outcomes is reached. This work is therefore allied with a  
529 diverse set of models that examine which competition among distinct solutions to  
530 environmental heterogeneity (e.g., Bull 1987; Svardal et al. 2011; Tufto 2015). These  
531 models help to illustrate how subtle differences in rates of adaptation could matter,  
532 further motivating the idea that evolvability can act as an organizing framework for  
533 evolutionary biology (Wagner & Altenberg 1996; Pigliucci 2008).

534

535 The results here show one path to specialization without trade-offs, but do the data  
536 suggest that an alternative to trade-offs is required? Populations are often found to be  
537 adapted to their local conditions, but this fact alone doesn't allow the inference that  
538 trade-offs are responsible for specialism. Kassen (2002) reviewed selection  
539 experiments in single environments and concluded that most showed evidence of  
540 negative genetic correlations for fitness across environments after selection for  
541 specialization. However, only about a third of these showed clear-cut evidence for  
542 general costs of adaptation—a decrease in fitness in unselected environments in  
543 parallel with specialization to the selected environment. Costs of adaptation may be  
544 caused by trade-offs, accumulation of mutations deleterious in unselected environments  
545 (Kawecki 1994), or a mix of both (e.g., Reboud & Bell 1997). These distinct causes can  
546 be teased apart by experiments that challenge some populations to evolve to multiple

547 environments while others specialize on particular resources, or by examining parallel  
548 changes across replicate populations adapting to a single environment. Both  
549 approaches have yield mixed results. For example, experiments with VSV have  
550 repeatedly found that the virus adapts differently to distinct cell types, but can adapt to  
551 multiple cell lines simultaneously without apparent cost (Turner & Elena 2000; Remold  
552 et al. 2008; Smith-Tsurkan et al. 2010). A similar experiment that challenged *E. coli* to  
553 evolve to use glucose, lactose, or a combination found that generalists did suffer  
554 apparent trade-offs after an initial period of rapid improvement in both environments  
555 (Satterwhite & Cooper 2015). Lenski's long-term evolution experiment with *E. coli* has  
556 been used to examine whether patterns in the decay of unselected functions indicates  
557 trade-offs or mere accumulation of unselected mutations—while an early analysis  
558 supported trade-offs (Cooper & Lenski 2000), a later re-examination supported  
559 mutational accumulation as the dominant factor (Leiby & Marx 2014). A yeast evolution  
560 experiment across eight environments showed a general pattern of specialization, but  
561 not necessarily trade-offs (Jerison et al. 2020); analysis of replicate populations showed  
562 a large role for stochastic forces in evolution. Chavhan et al. (2020) provide an empirical  
563 example in which costs of adaptation increase with population size, underlining the point  
564 that trade-offs are an outcome of evolutionary processes as well as a determinant of  
565 their course. Replicate experiments that yield trade-offs sometimes but not always are  
566 expected if possible mutations vary in their degree of antagonistic pleiotropy (Bono et al.  
567 2017). Detailed experimental evolution approaches can quantify causation in costs of  
568 adaptation: for example, one study with digital organisms distinguished the effects of  
569 beneficial and neutral mutations on non-selected traits (Ostrowski et al. 2007). These

570 approaches for investigating trade-offs are more broadly applicable than just laboratory  
571 experiments; for example, repeated evolutionary loss of eyes and pigment in cavefish  
572 has been studied with the same dichotomy of trade-offs and mutation accumulation  
573 (Jeffrey 2009).

574

575 The rather uncertain relevance of trade-offs for specialization in evolution experiments  
576 echoes the debate over the causes of specialization in the field (Fry 1996). There are a  
577 number of reasons why negative correlations in performance across environments may  
578 not be patent even if trade-offs are important (Joshi & Thompson 1995). In some cases,  
579 evolution may have also ameliorated significant trade-offs by reducing overlaps in the  
580 genetic bases of conflicting traits (Rausher 1988). Futuyma & Moreno (1988) point out  
581 that negative performance correlations, even when found, cannot simply be interpreted  
582 as the cause of niche breadth because those same performance traits are products of  
583 evolution. This dilemma motivates the theoretical approach pursued here in which the  
584 values of the two environments, in terms of both initial and potential fitness, are equal;  
585 differences in performance and therefore the payoff of exploiting each environment can  
586 then only emerge by the interplay of the performance and preference traits.

587

588 The question of whether specialization can evolve without being driven by existing  
589 trade-offs has been more recently discussed in relation to microbes, particularly viruses  
590 (Remold 2012), but, earlier, was inspired by patterns seen in phytophagous insects (Fry  
591 1996). In light of the results here, one puzzling characteristic of phytophagous insects is  
592 the existence of highly successful asexual lineages with very broad host ranges

593 (reviewed in Gibson 2019). The work presented here does not model competition  
594 between sexual and asexual lineages, and therefore does not attempt to predict or  
595 explain this empirical pattern. However, there are several connections to be drawn  
596 between this model and relevant features of asexual, generalist insects that could guide  
597 future work. First, as summarized in Gibson (2019), asexual generalist insects typically  
598 have limited ability to disperse and choose habitats; this feature could be approximated  
599 in this model as a high value of  $c$ , the cost of searching. Second, generalists may suffer  
600 a reduced ability to evolve in response to change in any one aspect of their niche, but  
601 this evolvability deficit might be compensated for by their increased population size  
602 (Whitlock 1996). The results presented here rely on a sizeable gap between an  
603 organism's current and optimal performance in each environment. Very large  
604 populations, whether sexual or asexual, may be able to keep pace with changing  
605 environments to such an extent that this performance gap does not arise. This  
606 reasoning parallels that expressed by Gibson (2019), who suggested that large  
607 populations with diverse hosts may benefit less from the effects of sex on evolvability,  
608 allowing more efficient asexual modes of reproduction to thrive. Experimental work by  
609 Hall et al. (2011) also highlights the idea that coevolutionary dynamics may induce  
610 different changes in niche breadth as compared to a single bout of adaptation to a static  
611 environment. Future work could explore how antagonistic coevolution with multiple  
612 hosts is shaped by the asymmetries in evolvability noted here.

613

614 The evolution of reduced niche breadth is often studied in models in which disruptive  
615 selection leads to partitioning of a niche by coexisting specialists (e.g., Roughgarden

616 1972), a process which is often linked with sympatric speciation (Doebeli & Dieckmann  
617 2000). My emphasis here was on the evolutionary transition from generalism to  
618 specialism in a single lineage, not niche partitioning; hence, important topics for niche  
619 partitioning like frequency dependence were relegated to the background. Similarly,  
620 there is a rich history of modeling competition among generalists and specialists, which  
621 shares overlapping concerns but foregrounds ecological factors like temporal  
622 heterogeneity, frequency-dependent selection, and adaptive behavior that allow  
623 coexistence (Wilson & Yoshimura 1994). Future work could build on the insights  
624 illustrated here to couple evolvability with a more fully realized ecological model.  
625 Similarly, the absence of trade-offs is not a requirement for the results described here;  
626 trade-offs are excluded to isolate focus on the role of evolvability. Future work could  
627 readily add trade-offs to the framework explored here to understand how genetic  
628 limitations on generalist fitness interact with evolvability differences between traits. The  
629 model here also does not consider philopatry or other scenarios in which a lineage  
630 experiences one environment for many sequential generations; this choice distinguishes  
631 the focus from models of local adaptation and specialization like Ronce & Kirkpatrick  
632 (2001). Future work could look at asymmetric evolvability across traits in ecological  
633 scenarios with more limited migration between environments.

634

635 This model relies on positive feedbacks between habitat preference and performance,  
636 mediated by the effect of each on the intensity of selection for the other. Joint evolution  
637 of this pair of traits has a rich history, as summarized above, but other traits can show  
638 the same type of positive interdependence—for example, feeding efficiency in a forager



639 changes the consumption of a given resource, and improvements in feeding efficiency  
640 and conversion efficiency of the same resource therefore interact synergistically  
641 (Vasconcelous & Rueffler 2020). More broadly, synergistic epistasis among aspects of  
642 fitness might lead to accelerated adaptation to one part of a niche, setting the stage for  
643 specialism to evolve. Based on this speculation, future work might profitably extend the  
644 model explored here to include more explicit links between traits, ecology, and fitness.  
645

646 These results leverage the findings of Schiffels et al. (2011), and later work by Gomez  
647 et al. (2020) and Venkataram et al. (2019), to illustrate that asexual adaptation is not  
648 just slower than adaptation with recombination, but differs in other significant aspects.  
649 Other models have predicted differences in the nature of adaptation in asexual versus  
650 sexual organisms, such as difference in epistasis among fixed mutations (Livnat et al.  
651 2008) and, as discussed above, asexuality is linked with extreme generalism in some  
652 insects (Gibson 2019). Still, there has not been a broad, synthetic effort to understand  
653 how sex and other important determinants of evolvability shape not just the rate of  
654 evolution, but bias adaptation toward distinct phenotypes, niches, or life-histories. It is  
655 hoped that this work will help push toward such an effort, and start to fully realize the  
656 goal of integrating evolvability with our understanding of the forces shaping the niche.  
657

## 658 **Acknowledgements**

659 [omitted during double-blind review]

660

## 661 **References**

- 662 Abrams, P. A., & Matsuda, H. (1997) Prey adaptation as a cause of predator-prey  
663 cycles. *Evolution*, 51(6), 1742-1750.
- 664 Bell, G. (2017) Evolutionary rescue. *Annual Review of Ecology, Evolution, and*  
665 *Systematics*, 48, 605-627.
- 666 Bono, L. M., Draghi, J. A., & Turner, P. E. (2020). Evolvability costs of niche  
667 expansion. *Trends in Genetics*, 36(1), 14-23.
- 668 Bono, L. M., Smith Jr, L. B., Pfennig, D. W., & Burch, C. L. (2017). The emergence of  
669 performance trade-offs during local adaptation: insights from experimental  
670 evolution. *Molecular ecology*, 26(7), 1720-1733.
- 671 Bull, J. J. (1987) Evolution of phenotypic variance. *Evolution*, 41(2), 303-315.
- 672 Castillo-Chavez, C., Levin, S. A., & Gould, F. (1988) Physiological and behavioral  
673 adaptation to varying environments: a mathematical model. *Evolution*, 42(5), 986-  
674 994.
- 675 Charnov, E. L. (1976) Optimal foraging, the marginal value theorem. *Theoretical*  
676 *Population Biology* 9, 129-136.
- 677 Chavhan, Y., Malusare, S., & Dey, S. (2020) Larger bacterial populations evolve heavier  
678 fitness trade-offs and undergo greater ecological specialization. *Heredity*, 124(6),  
679 726-736.
- 680 Clavel, J., Julliard, R., & Devictor, V. (2011) Worldwide decline of specialist species:  
681 toward a global functional homogenization? *Frontiers in Ecology and the*  
682 *Environment*, 9(4), 222-228.
- 683 Cooper, V. S. & Lenski, R. E. (2000) The population genetics of ecological  
684 specialization in evolving *Escherichia coli* populations. *Nature*, 407(6805), 736-739.

- 685 Cortez, M. H. & Weitz, J. S. (2014) Coevolution can reverse predator–prey cycles.  
686 *Proceedings of the National Academy of Sciences*, 111(20), 7486-7491.
- 687 Crespi, B. J. (2004) Vicious circles: positive feedback in major evolutionary and  
688 ecological transitions. *Trends in Ecology & Evolution*, 19(12), 627-633.
- 689 Doebeli, M. & Dieckmann, U. (2000) Evolutionary branching and sympatric speciation  
690 caused by different types of ecological interactions. *The American*  
691 *Naturalist*, 156(S4), S77-S101.
- 692 Feder, J. L. & Forbes, A. A. (2007) Habitat avoidance and speciation for phytophagous  
693 insect specialists. *Functional Ecology*, 585-597.
- 694 Forbes, M. R., Morrill, A., & Schellinck, J. (2017) Host species exploitation and  
695 discrimination by animal parasites. *Philosophical Transactions of the Royal Society*  
696 *B: Biological Sciences*, 372(1719), 20160090.
- 697 Fry, J.D. 1996. The evolution of host specialization: are trade- offs overrated? *The*  
698 *American Naturalist* 148: S84-S107.
- 699 Futuyma, D. J. & Moreno, G. (1988) The evolution of ecological specialization. *Annual*  
700 *review of Ecology and Systematics*, 19(1), 207-233.
- 701 Gerrish, P. J. & Lenski, R. E. (1998) The fate of competing beneficial mutations in an  
702 asexual population. *Genetica*, 102, 127.
- 703 Gibson, A. K. (2019) Asexual parasites and their extraordinary host ranges. *Integrative*  
704 *and Comparative Biology*, 59(6), 1463-1484.
- 705 Gomez, K., Bertram, J., & Masel, J. (2020) Mutation bias can shape adaptation in large  
706 asexual populations experiencing clonal interference. *BioRxiv*.

- 707 Hall, A. R., Scanlan, P. D., & Buckling, A. (2011). Bacteria-phage coevolution and the  
708 emergence of generalist pathogens. *The American Naturalist*, 177(1), 44-53.
- 709 Hiltunen, T., Hairston Jr, N. G., Hooker, G., Jones, L. E., & Ellner, S. P. (2014) A newly  
710 discovered role of evolution in previously published consumer–resource dynamics.  
711 *Ecology Letters*, 17(8), 915-923.
- 712 Holt, R. D. (1985) Population dynamics in two-patch environments: some anomalous  
713 consequences of an optimal habitat distribution. *Theoretical Population*  
714 *Biology*, 28(2), 181-208.
- 715 Holt, R. D. (1996a) Demographic constraints in evolution: towards unifying the  
716 evolutionary theories of senescence and niche conservatism. *Evolutionary*  
717 *Ecology*, 10(1), 1-11.
- 718 Holt, R.D. (1996b) Adaptive evolution in source-sink environments: direct and indirect  
719 effects of density-dependence on niche evolution. *Oikos* 75, 182–192.
- 720 Holt, R. D. & Gaines, M. S. (1992) Analysis of adaptation in heterogeneous landscapes:  
721 implications for the evolution of fundamental niches. *Evolutionary Ecology*, 6(5), 433-  
722 447.
- 723 Jasmin, J. N. & Kassen, R. (2007). On the experimental evolution of specialization and  
724 diversity in heterogeneous environments. *Ecology Letters*, 10(4), 272-281.
- 725 Jeffery, W. R. (2009) Regressive evolution in *Astyanax* cavefish. *Annual Review of*  
726 *Genetics*, 43, 25-47.
- 727 Jerison, E. R., Ba, A. N. N., Desai, M. M., & Kryazhimskiy, S. (2020). Chance and  
728 necessity in the pleiotropic consequences of adaptation for budding yeast. *Nature*  
729 *Ecology & Evolution*, 4(4), 601-611.

- 730 Joshi, A. & Thompson, J.N. (1995) Trade-offs and the evolution of host specialization.  
731 *Evolutionary Ecology*. 9: 82-92.
- 732 Kassen, R. (2002). The experimental evolution of specialists, generalists, and the  
733 maintenance of diversity. *Journal of evolutionary biology*, 15(2), 173-190.
- 734 Kawecki, T. J. (1994) Accumulation of deleterious mutations and the evolutionary cost  
735 of being a generalist. *The American Naturalist*, 144(5), 833-838.
- 736 Kawecki, T. J., Barton, N. H., & Fry, J. D. (1997) Mutational collapse of fitness in  
737 marginal habitats and the evolution of ecological specialisation. *Journal of*  
738 *Evolutionary Biology*, 10(3), 407-429.
- 739 Kawecki, T.J. (1998) Red queen meets Santa Rosalia: arms races and the evolution of  
740 host specialization in organisms with parasitic lifestyles. *The American Naturalist*  
741 152, 635–651
- 742 Kimura, M. (1968) Genetic variability maintained in a finite population due to mutational  
743 production of neutral and nearly neutral isoalleles. *Genetics Research*, 11(3), 247-  
744 270.
- 745 Kirkpatrick, M., & Barton, N. H. (1997) Evolution of a species' range. *The American*  
746 *Naturalist*, 150(1), 1-23.
- 747 Kremer, C. T. & Klausmeier, C. A. (2017) Species packing in eco-evolutionary models  
748 of seasonally fluctuating environments. *Ecology Letters*, 20(9), 1158-1168.
- 749 Lankau, R. A. (2011) Rapid evolutionary change and the coexistence of species. *Annual*  
750 *Review of Ecology, Evolution, and Systematics*, 42, 335-354.

- 751 Leiby, N. & Marx, C. J. (2014) Metabolic erosion primarily through mutation  
752 accumulation, and not tradeoffs, drives limited evolution of substrate specificity in  
753 *Escherichia coli*. *PLoS Biology*, 12(2), e1001789.
- 754 Levins, R. (1962). Theory of fitness in a heterogeneous environment. I. The fitness set  
755 and adaptive function. *The American Naturalist*, 96(891), 361-373.
- 756 Livnat, A., Papadimitriou, C., Dushoff, J., & Feldman, M. W. (2008). A mixability theory  
757 for the role of sex in evolution. *Proceedings of the National Academy of*  
758 *Sciences*, 105(50), 19803-19808.
- 759 MacArthur, R. H., & Pianka, E. R. (1966) On optimal use of a patchy environment. *The*  
760 *American Naturalist*, 100(916), 603-609.
- 761 Ostrowski, E. A., Ofria, C., & Lenski, R. E. (2007). Ecological specialization and  
762 adaptive decay in digital organisms. *The American Naturalist*, 169(1), E1-E20.
- 763 Pigliucci, M. (2008). Is evolvability evolvable?. *Nature Reviews Genetics*, 9(1), 75-82.
- 764 Poisot, T., Bever, J. D., Nemri, A., Thrall, P. H., & Hochberg, M. E. (2011) A conceptual  
765 framework for the evolution of ecological specialisation. *Ecology Letters*, 14(9), 841-  
766 851.
- 767 Poisot, T., Kéfi, S., Morand, S., Stanko, M., Marquet, P. A., & Hochberg, M. E. (2015) A  
768 continuum of specialists and generalists in empirical communities. *PloS One*, 10(5),  
769 e0114674.
- 770 Prentis, P. J., Wilson, J. R., Dormontt, E. E., Richardson, D. M., & Lowe, A. J. (2008).  
771 Adaptive evolution in invasive species. *Trends in Plant Science*, 13(6), 288-294.
- 772 Rausher, M. D. (1988). Is coevolution dead? *Ecology*, 898-901.

- 773 Rausher, M. D. (1993). The evolution of habitat preference: avoidance and  
774 adaptation. In *Evolution of insect pests: patterns of variation*, 259-283.
- 775 Ravnigné, V., Dieckmann, U., & Olivieri, I. (2009) Live where you thrive: joint evolution of  
776 habitat choice and local adaptation facilitates specialization and promotes  
777 diversity. *The American Naturalist*, 174(4), E141-E169.
- 778 Reboud, X., & Bell, G. (1997). Experimental evolution in *Chlamydomonas*. III. Evolution  
779 of specialist and generalist types in environments that vary in space and  
780 time. *Heredity*, 78(5), 507-514.
- 781 Remold, S. (2012) Understanding specialism when the jack of all trades can be the  
782 master of all. *Proc. R. Soc. B Biol. Sci.* 279, 4861–4869
- 783 Remold, S. K., Rambaut, A., & Turner, P. E. (2008). Evolutionary genomics of host  
784 adaptation in vesicular stomatitis virus. *Molecular Biology and Evolution*, 25(6),  
785 1138-1147.
- 786 Ronce, O., & Kirkpatrick, M. (2001) When sources become sinks: migrational meltdown  
787 in heterogeneous habitats. *Evolution*, 55(8), 1520-1531.
- 788 Roughgarden, J. (1972) Evolution of niche width. *The American Naturalist*, 106(952),  
789 683-718.
- 790 Rosenzweig, M. L. (1981) A theory of habitat selection. *Ecology*, 62(2), 327-335.
- 791 Satterwhite, R. S., & Cooper, T. F. (2015) Constraints on adaptation of *Escherichia coli*  
792 to mixed-resource environments increase over time. *Evolution*, 69(8), 2067-2078.
- 793 Sexton, J. P., Montiel, J., Shay, J. E., Stephens, M. R., & Slatyer, R. A. (2017) Evolution  
794 of ecological niche breadth. *Annual Review of Ecology, Evolution, and*  
795 *Systematics*, 48.

- 796 Shoval, Oren, Hila Sheftel, Guy Shinar, Yuval Hart, Omer Ramote, Avi Mayo, Erez  
797 Dekel, Kathryn Kavanagh, and Uri Alon (2012) Evolutionary trade-offs, Pareto  
798 optimality, and the geometry of phenotype space. *Science* 336: 1157-1160.
- 799 Smith-Tsurkan, S. D., Wilke, C. O., & Novella, I. S. (2010). Incongruent fitness  
800 landscapes, not tradeoffs, dominate the adaptation of vesicular stomatitis virus to  
801 novel host types. *The Journal of General Virology*, 91(Pt 6), 1484.
- 802 Stapley, J., Santure, A. W., & Dennis, S. R. (2015) Transposable elements as agents of  
803 rapid adaptation may explain the genetic paradox of invasive species. *Molecular*  
804 *Ecology*, 24(9), 2241-2252.
- 805 Svardal, H., Rueffler, C., & Hermisson, J. (2011). Comparing environmental and genetic  
806 variance as adaptive response to fluctuating selection. *Evolution*, 65(9), 2492-2513.
- 807 Templeton, A. R., & Rothman, E. D. (1981). Evolution in fine-grained environments. II.  
808 Habitat selection as a homeostatic mechanism. *Theoretical Population*  
809 *Biology*, 19(3), 326-340.
- 810 Thompson, J. N. (1998) Rapid evolution as an ecological process. *Trends in Ecology &*  
811 *Evolution*, 13(8), 329-332.
- 812 Tufto, J. (2015) Genetic evolution, plasticity, and bet-hedging as adaptive responses to  
813 temporally autocorrelated fluctuating selection: A quantitative genetic model.  
814 *Evolution*, 69(8), 2034-2049.
- 815 Turner, P. E., & Elena, S. F. (2000) Cost of host radiation in an RNA  
816 virus. *Genetics*, 156(4), 1465-1470.
- 817 Vasconcelos, P. & Rueffler, C. (2020) How does joint evolution of consumer traits affect  
818 resource specialization? *The American Naturalist*, 195(2), 331-348.



- 819 Venkataram, S., Monasky, R., Sikaroodi, S. H., Kryazhimskiy, S., & Kaçar, B. (2019).  
820 The onset of evolutionary stalling and the limit on the power of natural selection to  
821 improve a cellular module. *bioRxiv*, 850644.
- 822 Wagner, G. P. & Altenberg, L. (1996) Perspective: complex adaptations and the  
823 evolution of evolvability. *Evolution*, 50(3), 967-976.
- 824 Whitlock, M.C. (1996) The red queen beats the jack-of-all-trades: the limitations on the  
825 evolution of phenotypic plasticity and niche breadth. *The American Naturalist* 148,  
826 S65–S77
- 827 Wilson, D.S. and Yoshimura, J. (1994) On the coexistence of specialists and  
828 generalists. *The American Naturalist* 144, 692–707

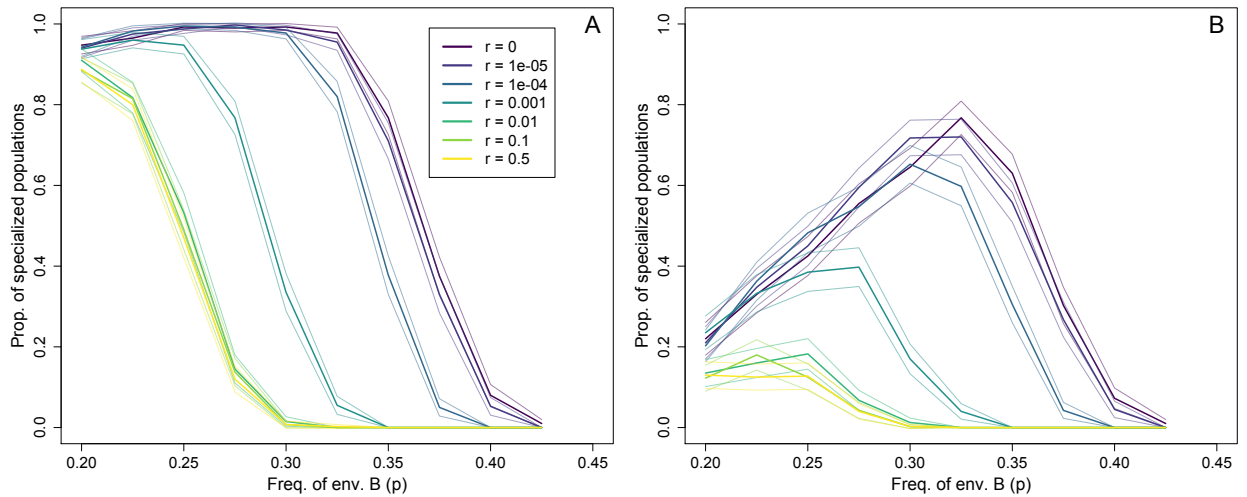

**Supplemental Figure 1:** Evolved niche breadths across a range of values of  $p$  ( $x$ -axis) and  $r$  (colors). A population is classified as ‘specialists’ if at least 95% (*panel A*) or 97.5% (*panel B*) of individuals have at least a 90% rejection rate for the less common environment B. Thin lines indicate 95% confidence intervals based on the normal approximation. Four hundred replicates were performed for each combination of parameters. As above,  $K = 10,000$ ,  $L = 100$ ,  $\mu_A = 5 \times 10^{-4}$ ,  $\mu_B = 5 \times 10^{-4}$ ,  $\mu_{\text{pref}} = 0.001$ , and  $c = 0.25$ .

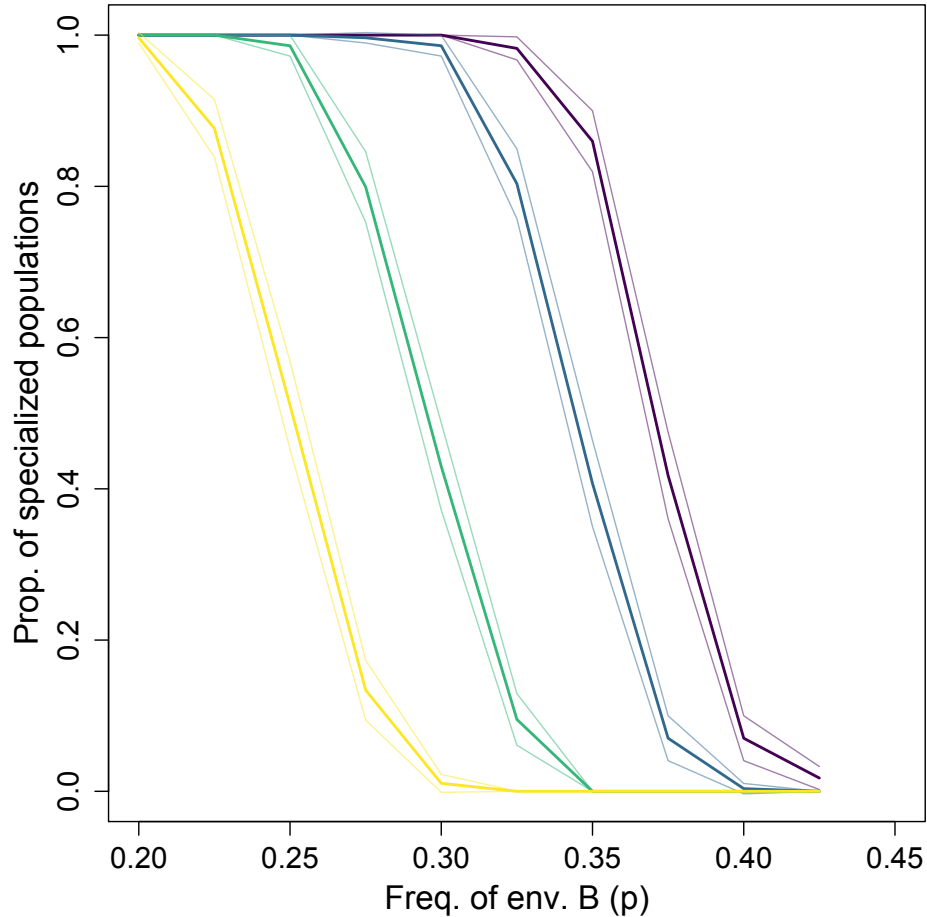

**Supplemental Figure 2:** Evolved niche breadths across a range of values of  $p$  ( $x$ -axis) and  $r$  (colors). In contrast to Fig. 3, here  $r = 0.5$  between the preference locus and the set of loci for performance in A. A population is classified as ‘specialists’ if at least 90% of individuals have at least a 90% rejection rate for the less common environment B. Thin lines indicate 95% confidence intervals based on the normal approximation. Four hundred replicates were performed for each combination of parameters. As above,  $K = 10,000$ ,  $L = 100$ ,  $\mu_A = 5 \times 10^{-4}$ ,  $\mu_B = 5 \times 10^{-4}$ ,  $\mu_{\text{pref}} = 0.001$ , and  $c = 0.25$ .
